# Supplementary material for: Paenibacillus polymyxa NSY50 suppresses Fusarium wilt in cucumbers by regulating the rhizospheric microbial community
Source: PubMed Central journal article supplement (PMC5304210; doi:10.1038/srep41234), 2017-02-13
Supplement: srep41234-s1.pdf [file srep41234-s1.pdf]

***Paenibacillus polymyxa* NSY50 suppresses *Fusarium* wilt in cucumbers by regulating the rhizospheric microbial community**

Lu Shi<sup>a</sup>, Nanshan Du<sup>a</sup>, Sheng Shu<sup>a</sup>, Jin Sun<sup>a</sup>, Shuzhan Li<sup>a</sup>, Shirong Guo<sup>a\*</sup>

<sup>a</sup> Key Laboratory of Southern Vegetable Crop Genetic Improvement in Ministry of Agriculture, College of Horticulture, Nanjing Agricultural University, Nanjing 210095, People's Republic of China.

\* Corresponding author: TEL./FAX: +862584395267.  
E-mail address: [srguo@njau.edu.cn](mailto:srguo@njau.edu.cn) (S.-R. Guo).

### Supplementary Table 1

The criterions of choosing the raw 16S rRNA genes and ITS sequence pyrosequencing data.

| criterions |                                                                                                                                                                             |
|------------|-----------------------------------------------------------------------------------------------------------------------------------------------------------------------------|
| (1)        | The 250 bp reads were truncated at any site receiving an average quality score <20 over a 10 bp sliding window, discarding the truncated reads that were shorter than 50bp; |
| (2)        | exact barcode matching, 2 nucleotide mismatch in primer matching, reads containing ambiguous characters were removed;                                                       |
| (3)        | only sequences that overlap longer than 10 bp were assembled according to their overlap sequence. Reads which could not be assembled were discarded.                        |

### Supplementary Table 2

The number of *Penicillium* spp. in different samples at the species level.

| OTU ID                           | CK1   | CK2   | CK3  | FOC1 | FOC2 | FOC3 | NSY1 | NSY2 | NSY3 | NSY+FOC1 | NSY+FOC2 | NSY+FOC3 |
|----------------------------------|-------|-------|------|------|------|------|------|------|------|----------|----------|----------|
| <i>Penicillium brasilianum</i>   | 6     | 8     | 0    | 0    | 0    | 0    | 2    | 2    | 0    | 7        | 0        | 6        |
| <i>Penicillium citrinum</i>      | 14    | 5     | 0    | 1    | 0    | 1    | 2    | 0    | 0    | 0        | 0        | 1        |
| <i>Penicillium coffeae</i>       | 9     | 8     | 11   | 10   | 4    | 11   | 2    | 1    | 1    | 1        | 6        | 1        |
| <i>Penicillium mallochii</i>     | 0     | 0     | 0    | 1    | 1    | 0    | 0    | 2    | 1    | 0        | 0        | 0        |
| <i>Penicillium olsonii</i>       | 114   | 112   | 132  | 7    | 4    | 0    | 5    | 3    | 2    | 3        | 8        | 6        |
| <i>Penicillium oxalicum</i>      | 15    | 3     | 7    | 2    | 2    | 2    | 10   | 1    | 0    | 2        | 3        | 1        |
| <i>Penicillium sumatrense</i>    | 0     | 2     | 0    | 0    | 0    | 0    | 0    | 1    | 0    | 2        | 0        | 0        |
| <i>Penicillium toxicarium</i>    | 1     | 0     | 0    | 3    | 0    | 3    | 0    | 2    | 0    | 0        | 0        | 0        |
| <i>Penicillium tularense</i>     | 0     | 0     | 0    | 0    | 0    | 0    | 0    | 0    | 26   | 0        | 0        | 0        |
| <i>Penicillium</i> _Unclassified | 12972 | 11012 | 8678 | 296  | 220  | 225  | 7595 | 5905 | 4505 | 4151     | 3096     | 3487     |

## Supplementary Figure 1.

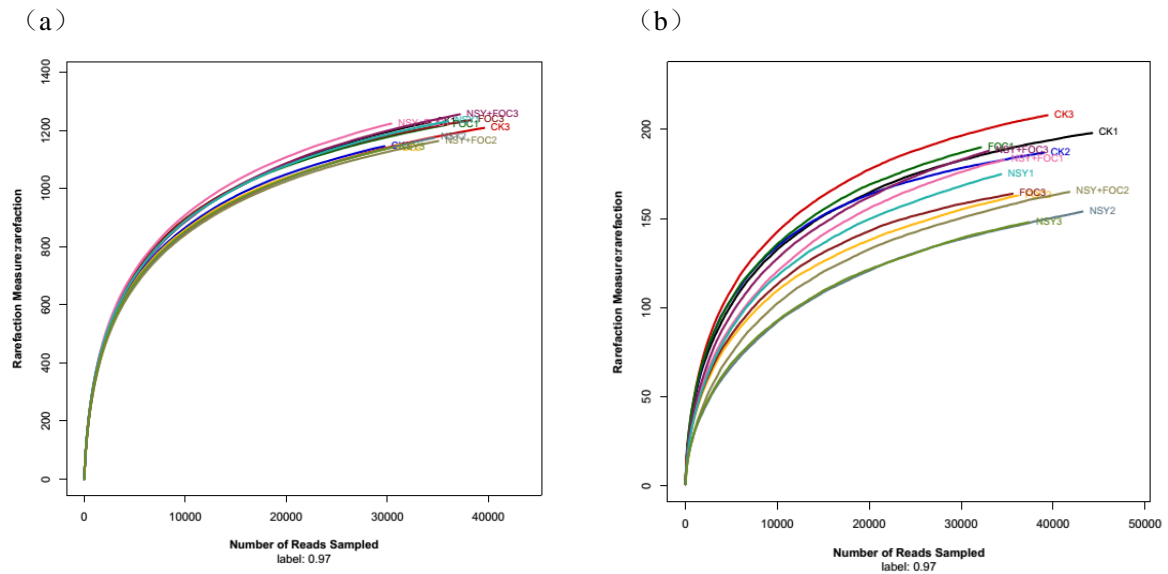

**Supplementary Figure 1.** Rarefaction analysis at 3% dissimilarity levels for soil samples collected from the four treatments (CK, untreated plants (control); NSY50, plants challenged with NSY50 ( $2.5 \times 10^8$  CFU/mL); FOC, plants challenged with FOC ( $1 \times 10^8$  CFU/mL); NSY50 + FOC: plants challenged with NSY50 for 3 days, and then with FOC). (a) bacterial; (b) fungi. The *vertical axis* shows the average number of OTUs that would be expected to be found after sampling the number of sequences shown on the *horizontal axis*.

## Supplementary Figure 2.

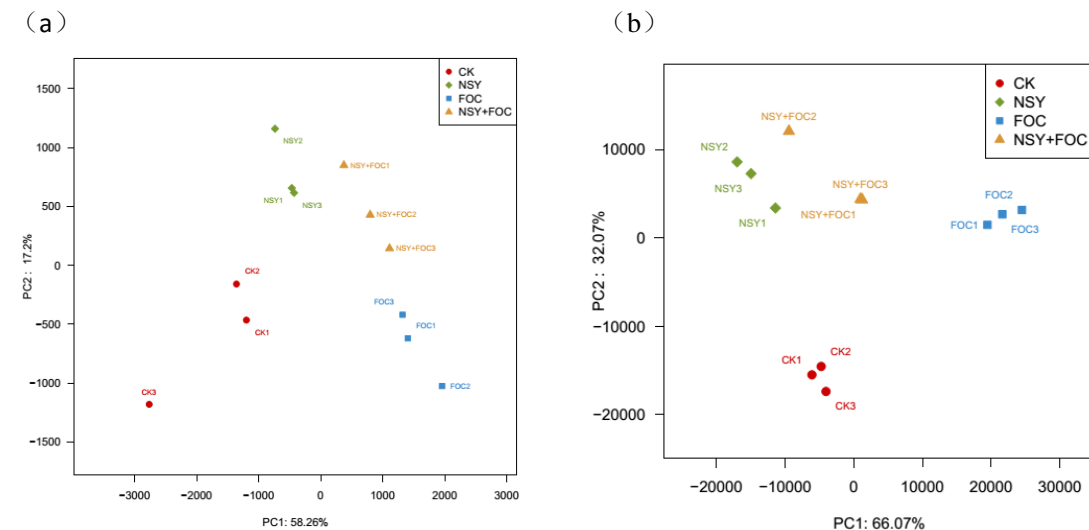

**Supplementary Figure 2.** Principal Component Analysis for soil samples collected from the four treatments (CK, untreated plants (control); NSY50, plants challenged with NSY50 ( $2.5 \times 10^8$  CFU/mL); FOC, plants challenged with FOC ( $1 \times 10^8$  CFU/mL); NSY50 + FOC: plants challenged with NSY50 for 3 days, and then with FOC). (a) bacteria; (b) fungi.

**Supplementary Figure 3.**

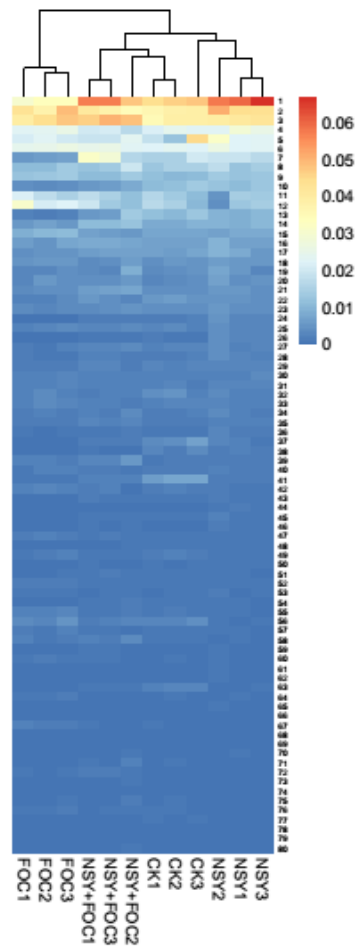

**Supplementary Figure 3.** Heatmap of the top 80 classified bacterial genera for soil samples collected from the four treatments (CK, untreated plants (control); NSY50, plants challenged with NSY50 ( $2.5 \times 10^8$  CFU/mL); FOC, plants challenged with FOC ( $1 \times 10^8$  CFU/mL); NSY50 + FOC: plants challenged with NSY50 for 3 days, and then with FOC). The color gradient from blue to red indicates increasing the relative abundance.

**Supplementary Figure 4.**

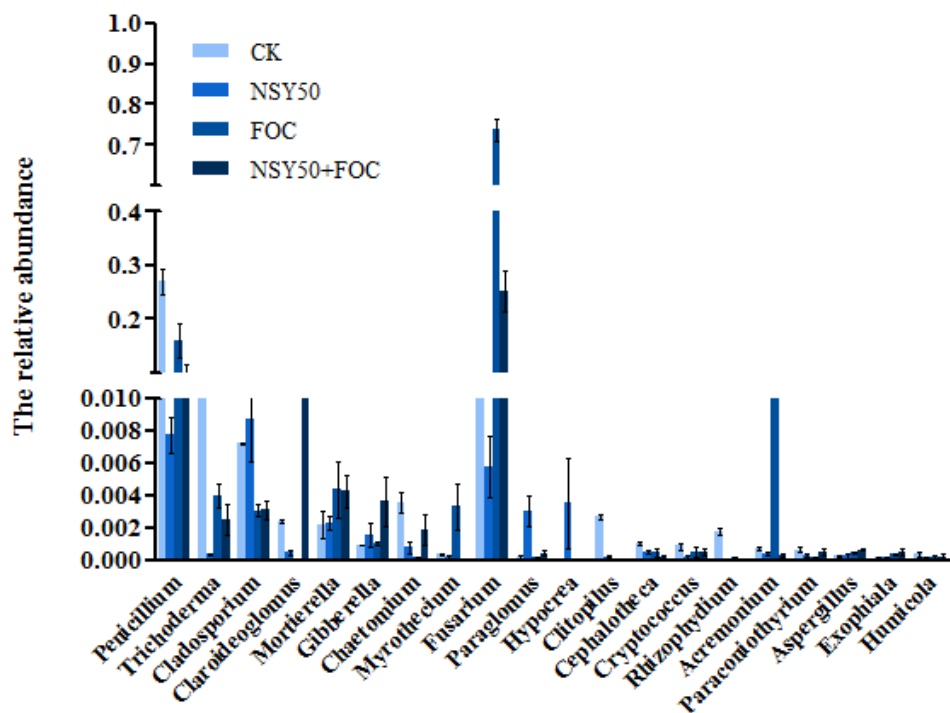

**Supplementary Figure 4.** The relative abundance of the main fungal genera for the soil samples collected from the four treatment groups (CK, untreated plants (control); NSY50, plants challenged with NSY50 ( $2.5 \times 10^8$  CFU/mL); FOC, plants challenged with FOC ( $1 \times 10^8$  CFU/mL); NSY50 + FOC: plants challenged with NSY50 for 3 days, and then with FOC). Each histogram represents the mean  $\pm$  SE of three independent biological experiments ( $n=3$ ).
